# Supplementary material for: Stochastically Gating Ion Channels Enable Patterned Spike Firing through Activity-Dependent Modulation of Spike Probability
Source: PLOS journal article supplement (doi:10.1371/journal.pcbi.1000290), 2009-02-13
Supplement: S5 (10.1371/journal.pcbi.1000290.s005) [file journal.pcbi.1000290.s005]

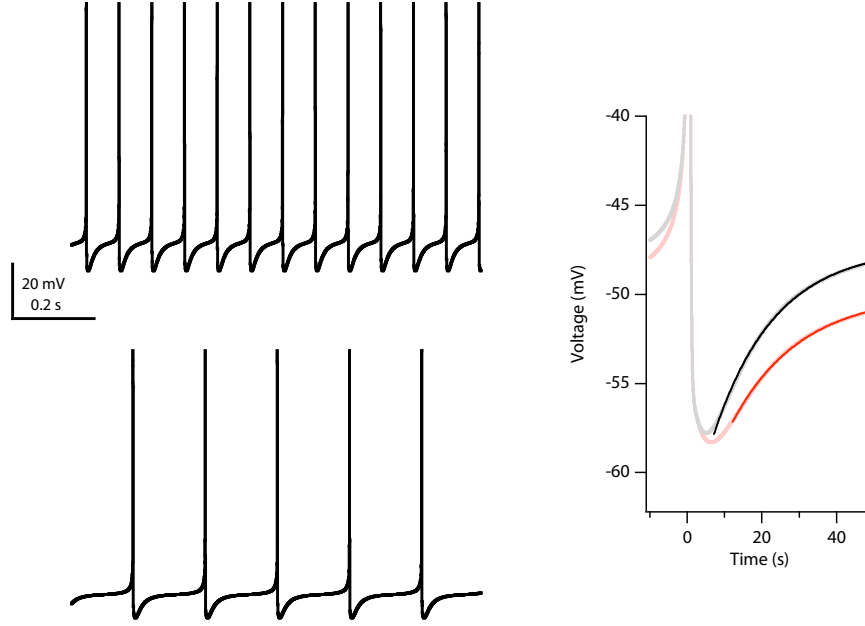

Figure S5: **Spiking properties of the deterministic model** Spiking responses in response to threshold current injection into the wild-type (upper trace) and HCN1 knock-out (lower trace) deterministic models. Spikes were aligned and averaged (right plot) for the wild-type (black) and HCN1 knock-out (red) simulations. Note the difference in AHP recovery (highlighted with exponential fit) between the models.
